# Supplementary material for: Comprehensive Analysis of the COBRA-Like (COBL) Gene Family in Gossypium Identifies Two COBLs Potentially Associated with Fiber Quality
Source: PLoS One. 2015 Dec 28;10(12):e0145725. doi: 10.1371/journal.pone.0145725 (PMC4692504; doi:10.1371/journal.pone.0145725)
Supplement: S5 Table — (XLS) [file pone.0145725.s009.xls]

## Sheet: Sheet1
S5 Table. Nucleotide polymorphism of COBL9 and COBL13 in cotton.
Gene Name	Ref. allele	Alt. allele	Ref. codon	Alt. codon	Ref. AA	Alt. AA	Types
COBL9 Dt	T	A	TAA	AAA	None	K	No stop detected
COBL13 Dt	G	A					Intron variant
	C	A					Intron variant
	A	T	CCA	CCT	P	P	Synonymous variant
	A	G					Intron variant
	T	G	TTA	GTA	L	V	Missense variant
